# Supplementary material for: Predictive analysis across spatial scales links zoonotic malaria to deforestation
Source: PubMed Central journal article supplement (PMC6367187; doi:10.1098/rspb.2018.2351), 2019-01-16
Supplement: rspb20182351supp1.pdf [file rspb20182351supp1.pdf]

1 SUPPLEMENTARY MATERIAL

2

3 *Predictive analysis across spatial scales links zoonotic malaria to deforestation*

4

5 Patrick M. Brock, Kimberly M. Fornace, Matthew J. Grigg, Nick M. Anstey, Timothy William,  
6 Jon Cox, Chris J. Drakeley, Heather M. Ferguson, Rowland R. Kao

7

8

9

10 Supplementary Material Content

11 Figure S1: Top 16 predictors

12 Figure S2: Marginal effect curves of full model including non-scalable variables

13 Figure S3: Correlations across scales

14 Figure S4: Variance with relative variable importance

15 Figure S5: Case cluster profiles

16 Figure S6: Single-scale model predictive ability by scale

17 Table S1: Correlations of variance with relative variable importance

18 Figure S1. Relative variable importance (RVI) of the 16 most important variable-scale  
 19 combinations from a) the full BRT model fitted across the whole study site (176 predictors);  
 20 and b) the full BRT model fitted across the whole study site including two additional non-  
 21 scalable variables – shortest distance to road and clinic – (178 predictors).  
 22  
 23

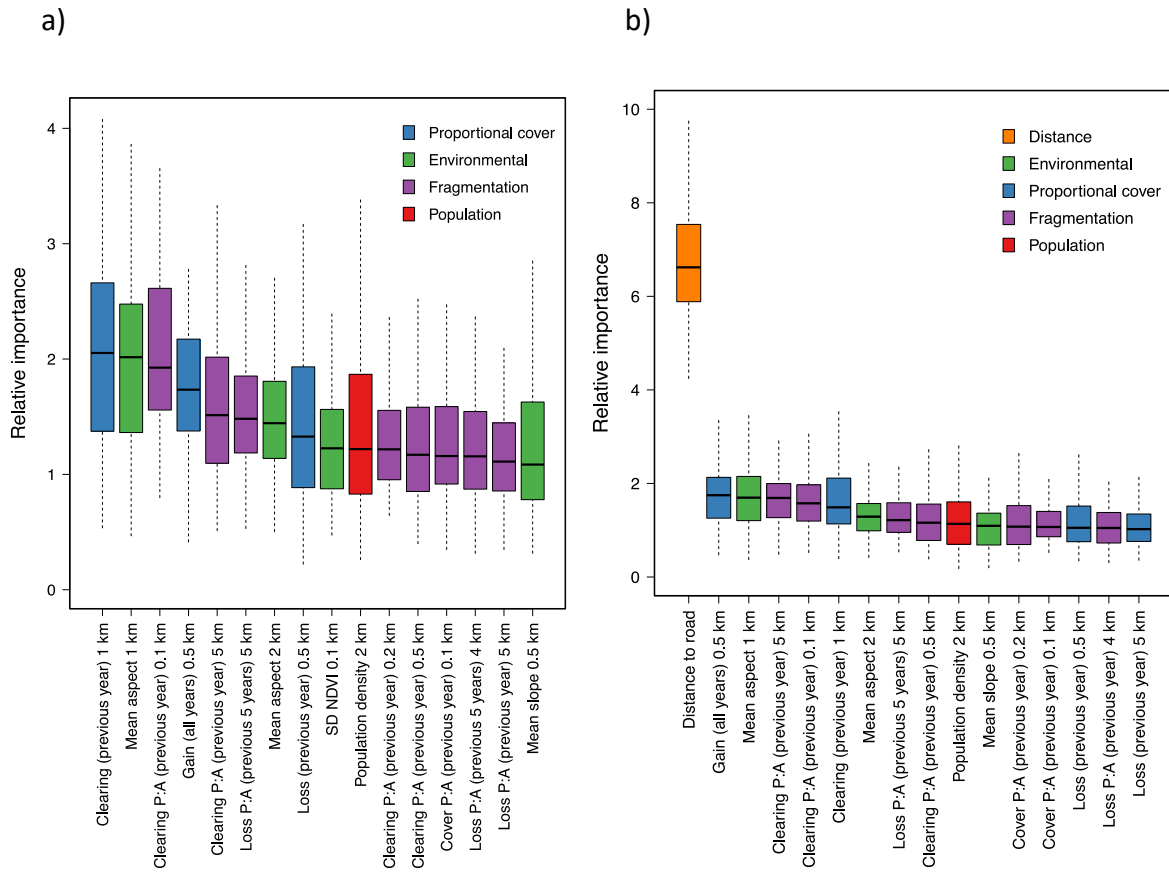

26 Figure S2. Marginal effect curves of the 16 variable-scale combinations with the highest relative variable importance (RVI) from the full BRT  
27 model fitted across the whole study site including two additional non-scalable variables – shortest distance to road and clinic – (178  
28 predictors).  
29  
30  
31

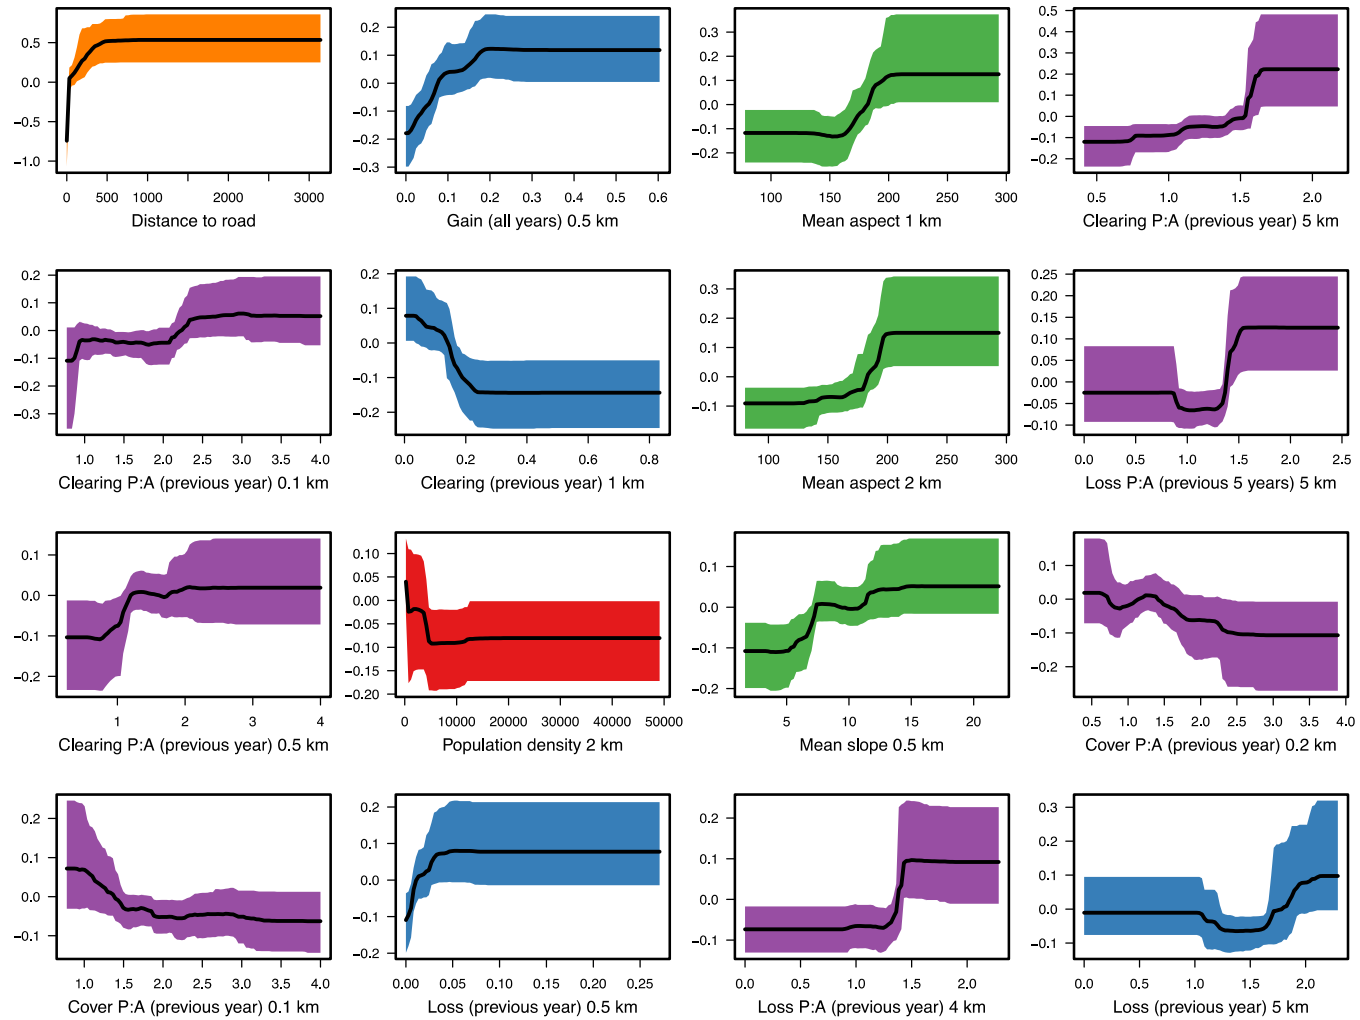

32  
33

34 Figure S3. Spearman rank correlations between scales for all 16 scalable landscape variables.

35

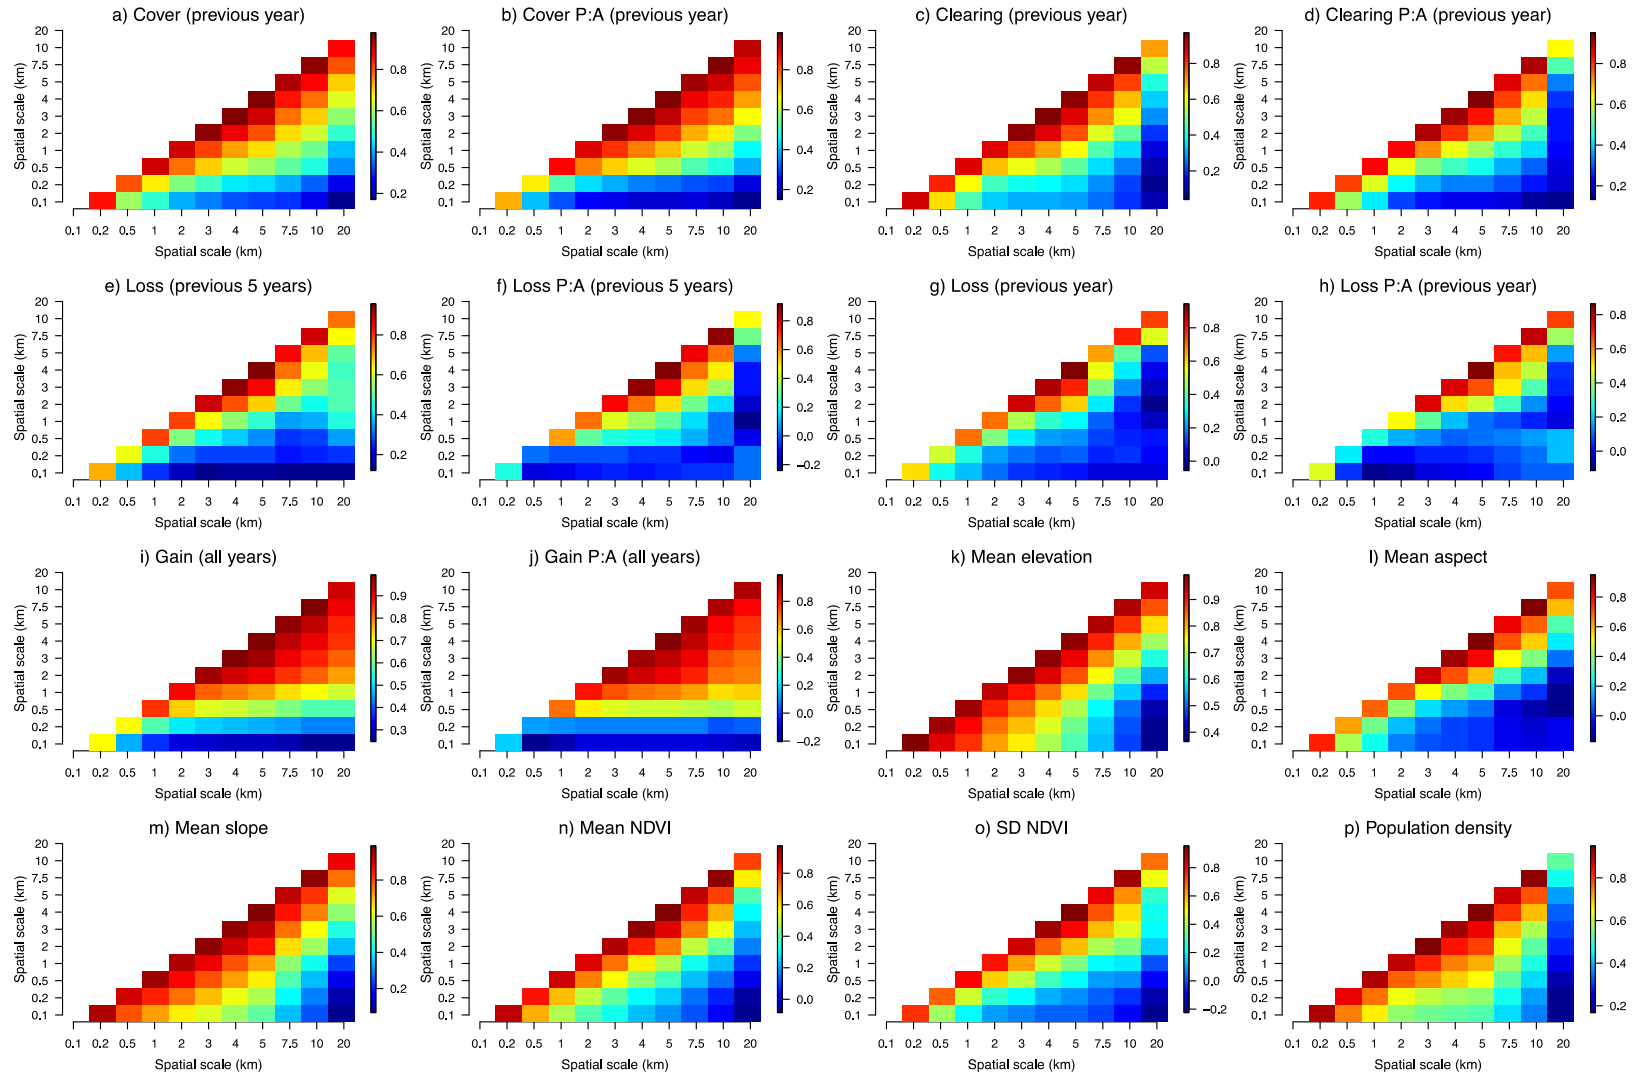

36

37 Figure S4. Relative variances superimposed on the traces of relative variable importance (RVI) of all variable-scale combinations (as shown in  
 38 Figure 2) from full BRT models of *P. knowlesi* occurrence (176 predictors). Green points represent the whole study site, blue points mainland-  
 39 only data.

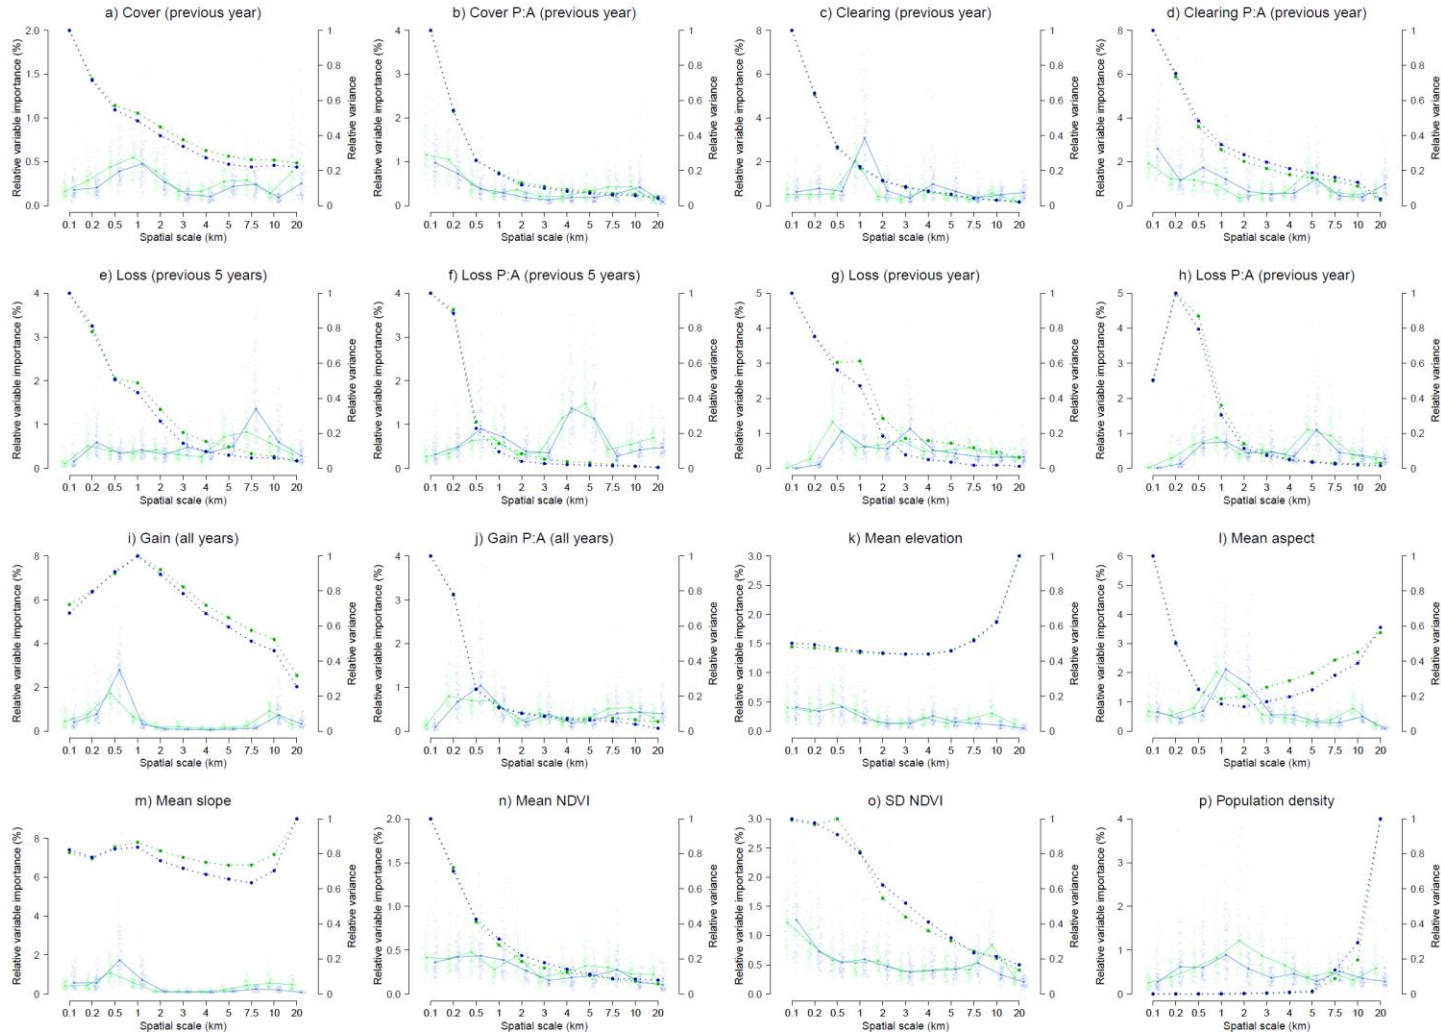

41 Figure S5. Variation in the 15 variable-scale combinations with the greatest differences in  
 42 median marginal probability of occurrence between clusters. Cluster A shown in purple,  
 43 cluster B shown in orange.  
 44

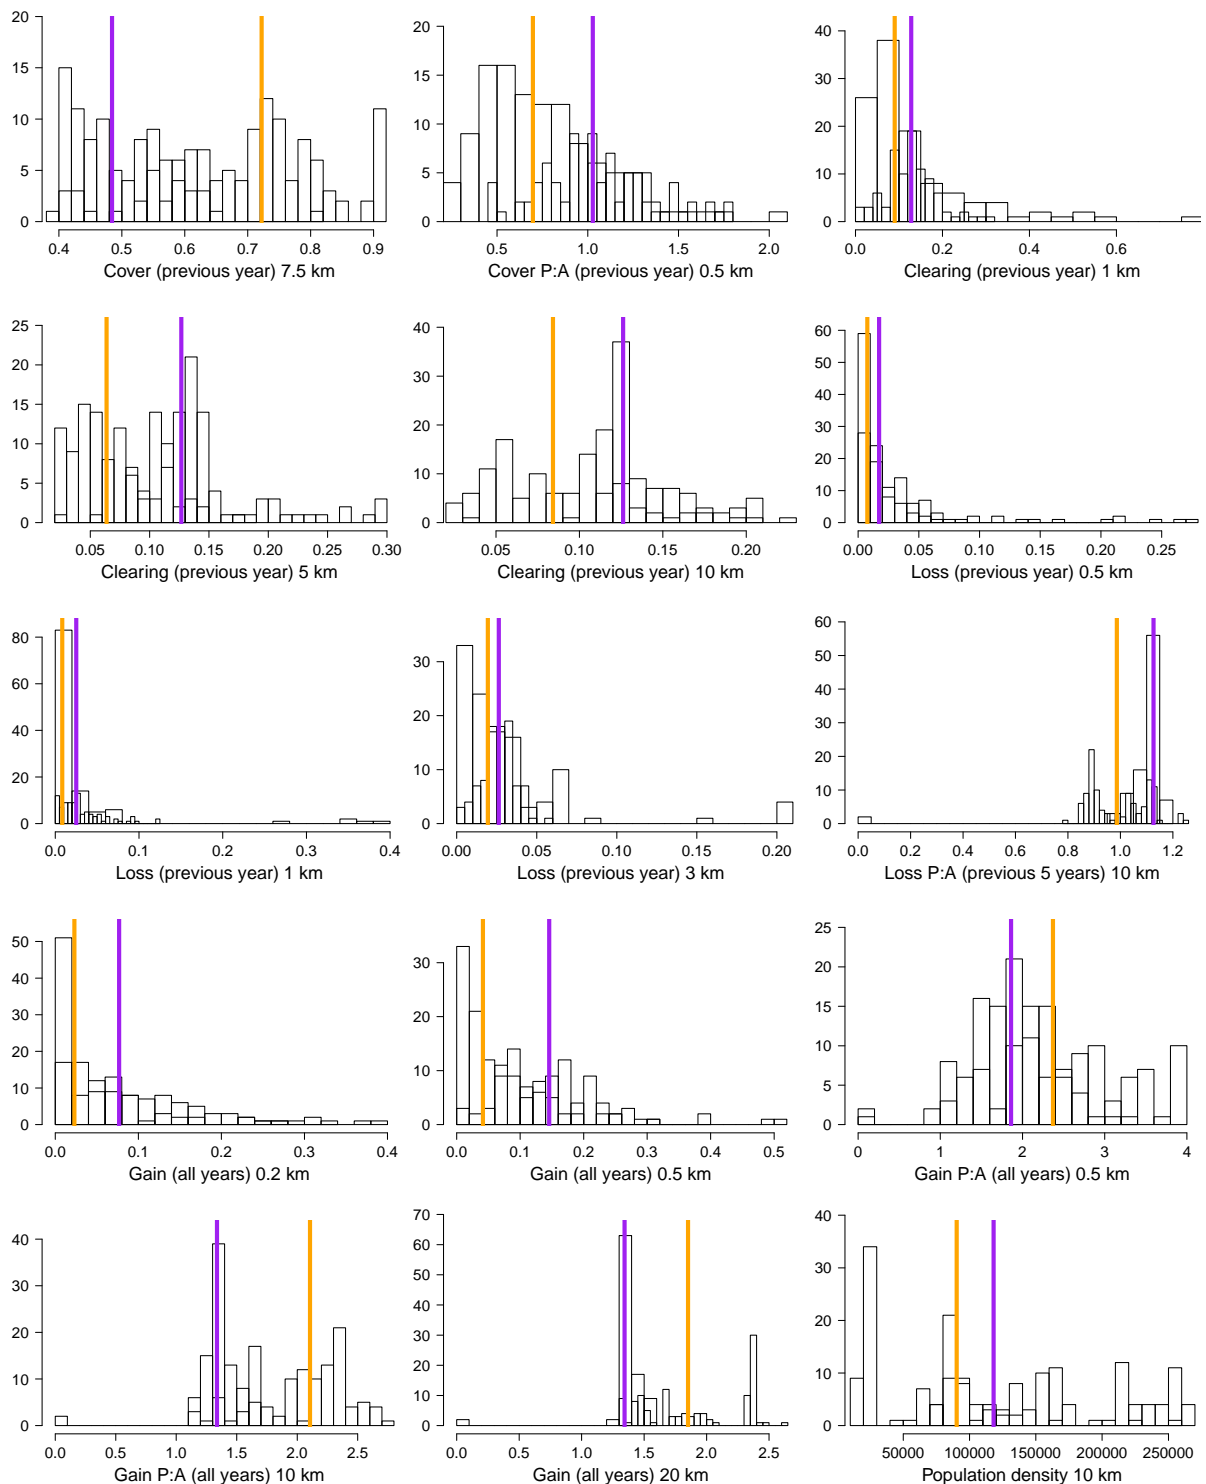

45  
46

47 Figure S6. The predictive ability of BRT models of *P. knowlesi* occurrence across spatial  
48 scales, with variables summarised over the same single scale (0.1-20 km; 16 predictors per  
49 model) and simultaneously over all 11 scales (All; 176 predictors per model). Green and  
50 yellow points represent models fitted across the whole study site, blue and purple points  
51 models fitted to mainland data only. AUC denotes area under the receiver operator curve.  
52

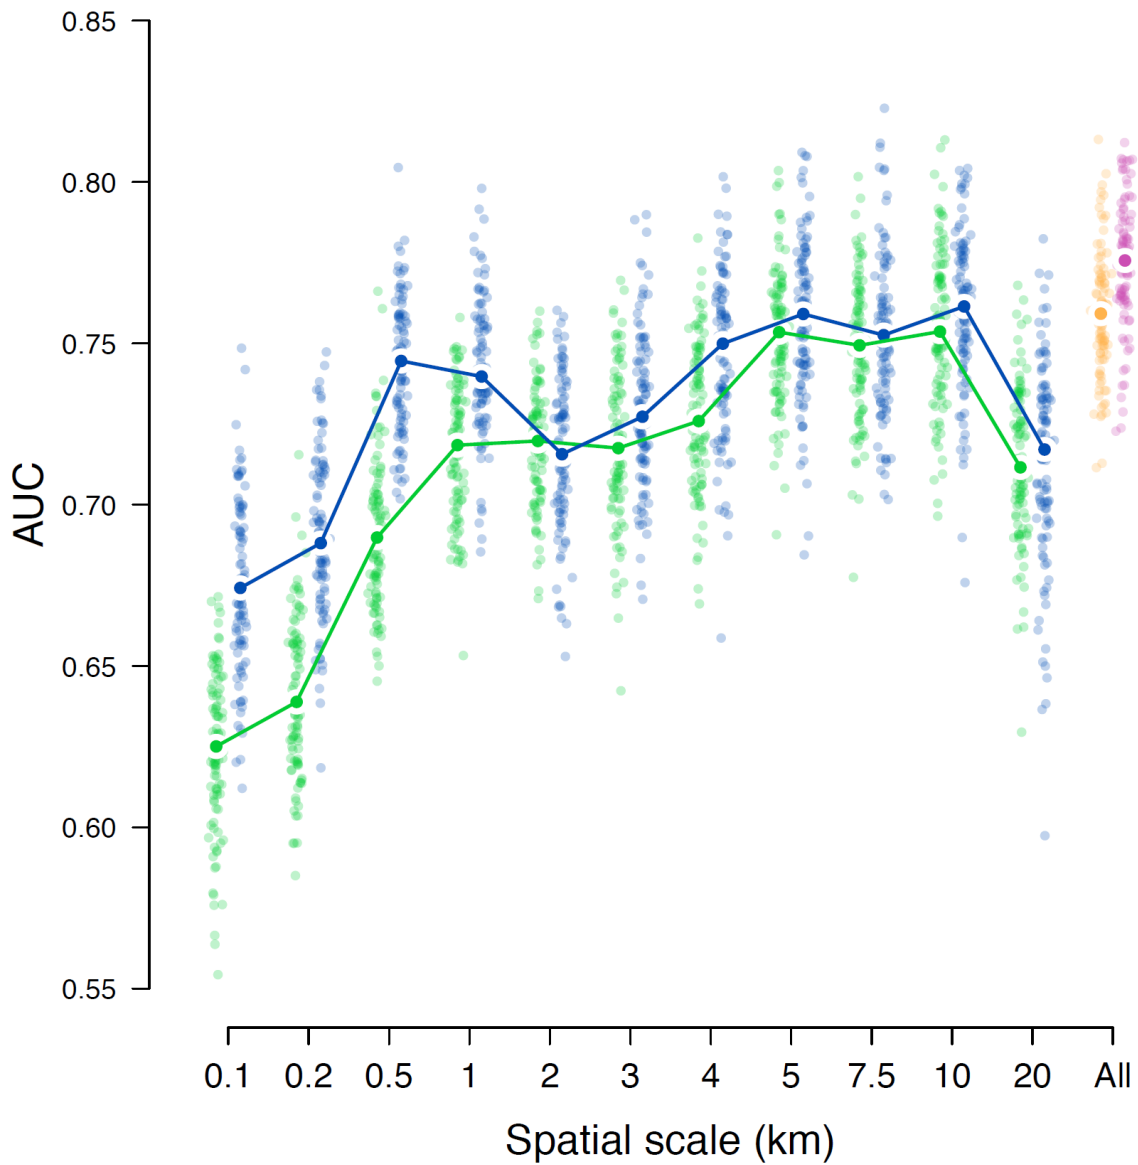

53



54 Table S1. Spearman rank correlations comparing relative variance with median relative  
 55 variable importance (RVI) across spatial scales from the full BRT model fitted across the  
 56 whole study site (176 predictors).

57

58

| Variable                    | Spearman's rank correlation coefficient | Spearman's rank correlation test p-value |
|-----------------------------|-----------------------------------------|------------------------------------------|
| Cover (previous year)       | 0.02                                    | 0.539                                    |
| Cover P:A (previous year)   | 0.91                                    | 0.061                                    |
| Cleared (previous year)     | 0.05                                    | 0.248                                    |
| Cleared P:A (previous year) | 0.76                                    | 0.094                                    |
| Loss (previous 5 years)     | -0.49                                   | 0.286                                    |
| Loss P:A (previous 5 years) | -0.44                                   | 0.087                                    |
| Loss (previous year)        | -0.17                                   | 0.86                                     |
| Loss P:A (previous year)    | -0.22                                   | 0.734                                    |
| Gain (all years)            | 0.26                                    | 0.755                                    |
| Gain P:A (all years)        | 0.03                                    | 0.734                                    |
| Mean elevation              | -0.31                                   | 0.989                                    |
| Mean aspect                 | -0.38                                   | 0.061                                    |
| Mean slope                  | 0.36                                    | 0.094                                    |
| Mean NDVI                   | 0.63                                    | 0.034                                    |
| SD NDVI                     | 0.6                                     | 0.052                                    |
| Population density          | -0.09                                   | 0.924                                    |

59

60

61
